# Supplementary material for: Lettuce Soil Microbiome Modulated by an L-α-Amino Acid-Based Biostimulant
Source: MDPI journal article supplement (doi:10.3390/agriculture13020344), 2023-01-31
Supplement: s1 [file s1]

## SUPPLEMENTARY MATERIAL

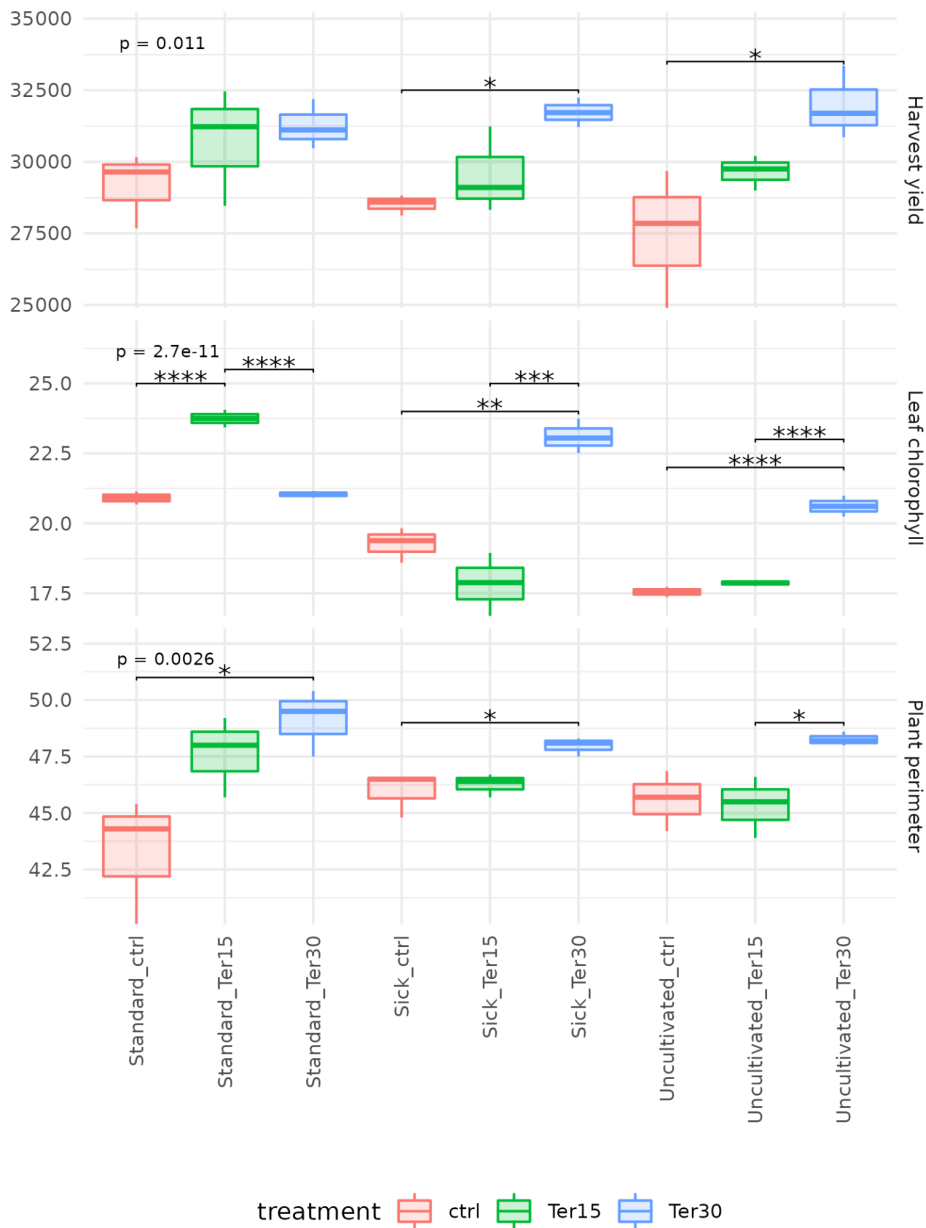

**Figure S1** Harvest yield (kg/Ha), plant perimeter (cm) and leaf chlorophyll content (CCI) phenotype comparison among Terramin 15, Terramin 30 and the control condition. P- values shown in the top of the facets indicate the significance of ANOVA test. Significant differences between groups are indicated as follows: \* (p-value < 0.05), \*\* (p-value < 0.005), \*\*\* (p-value < 0.0005), \*\*\*\* (p-value < 0.00005).

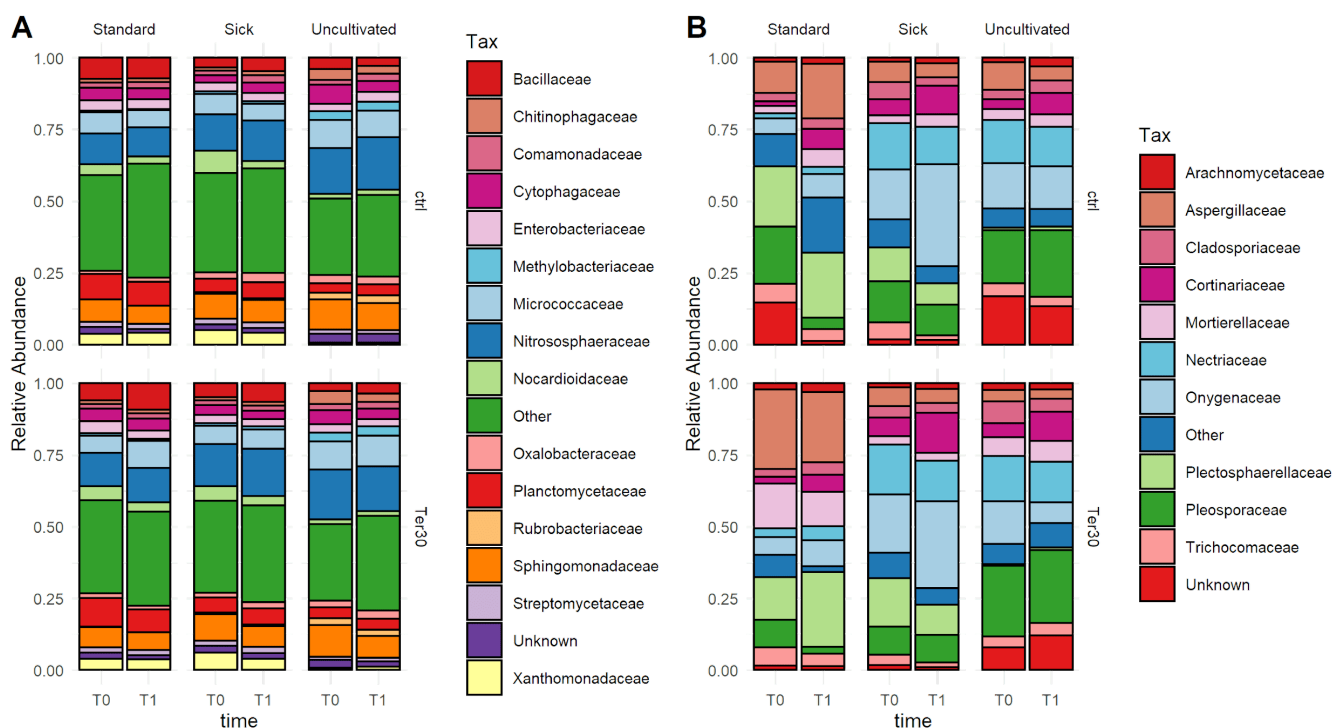

**Figure S2** Relative abundance at family level of the archaeal and bacterial (Panel A) and fungal microbiota (Panel B), before and after treatment with Terramin 30 and control condition in standard, sick and uncultivated soil types.

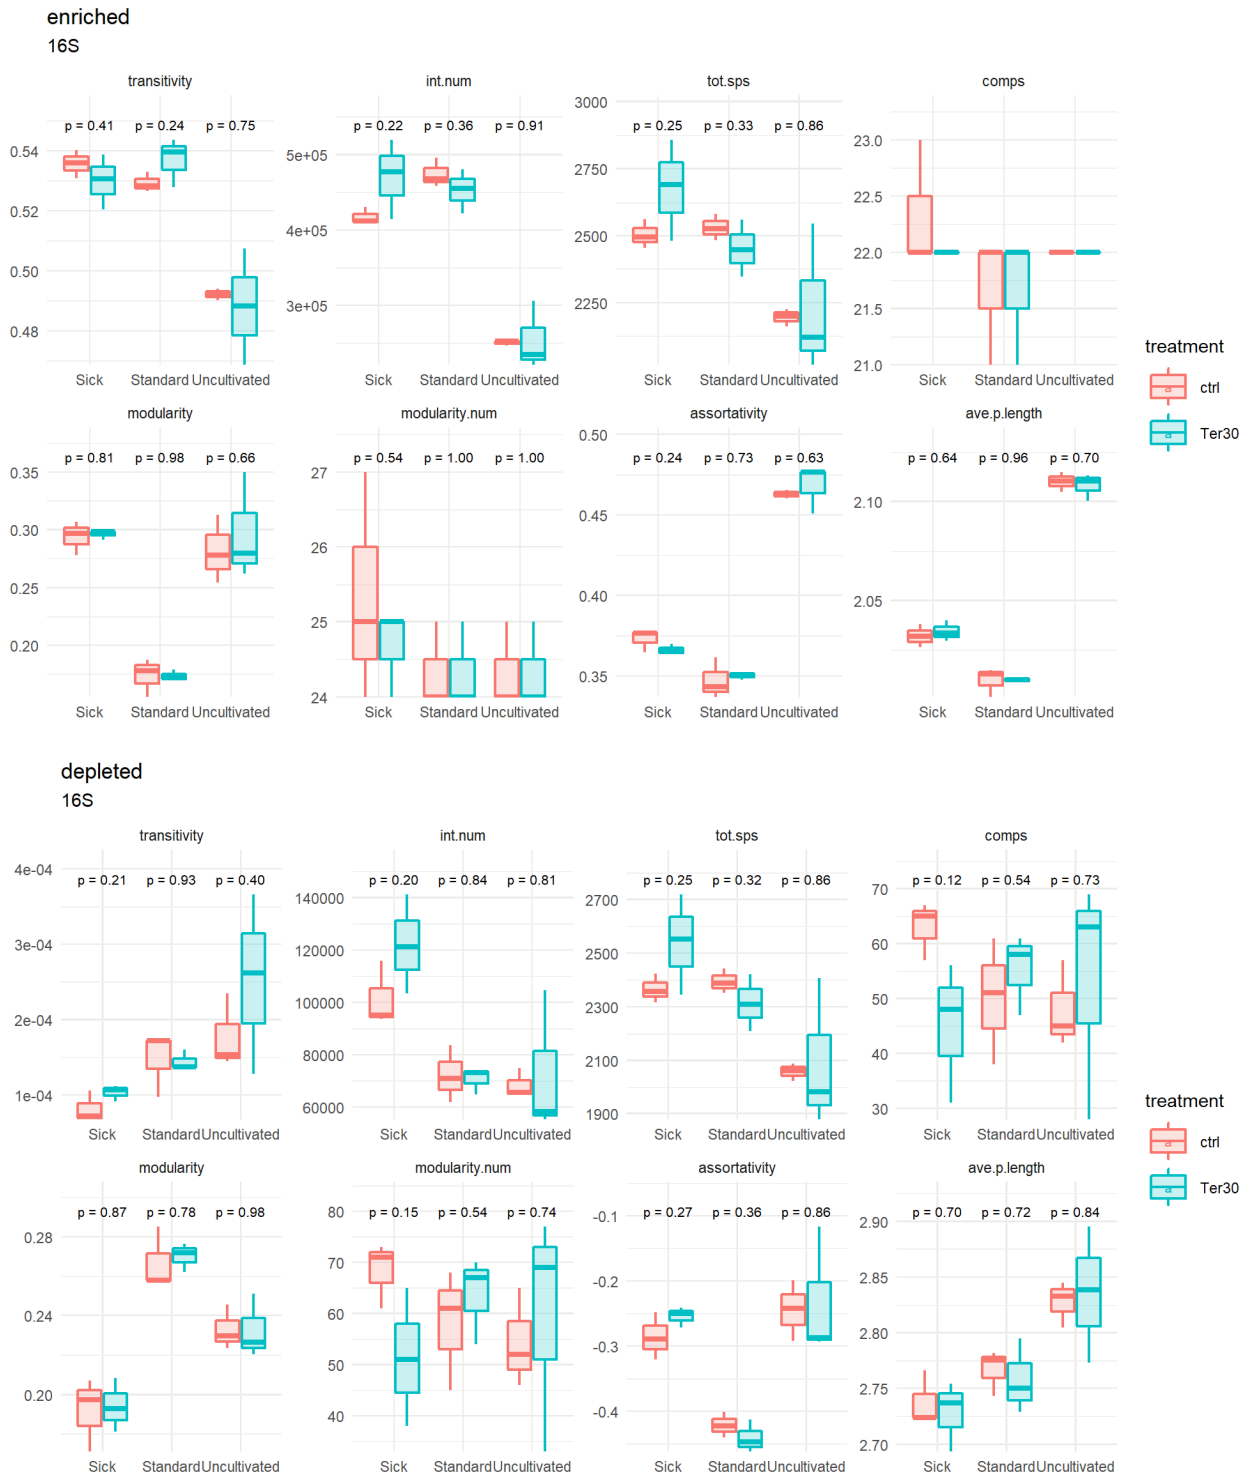

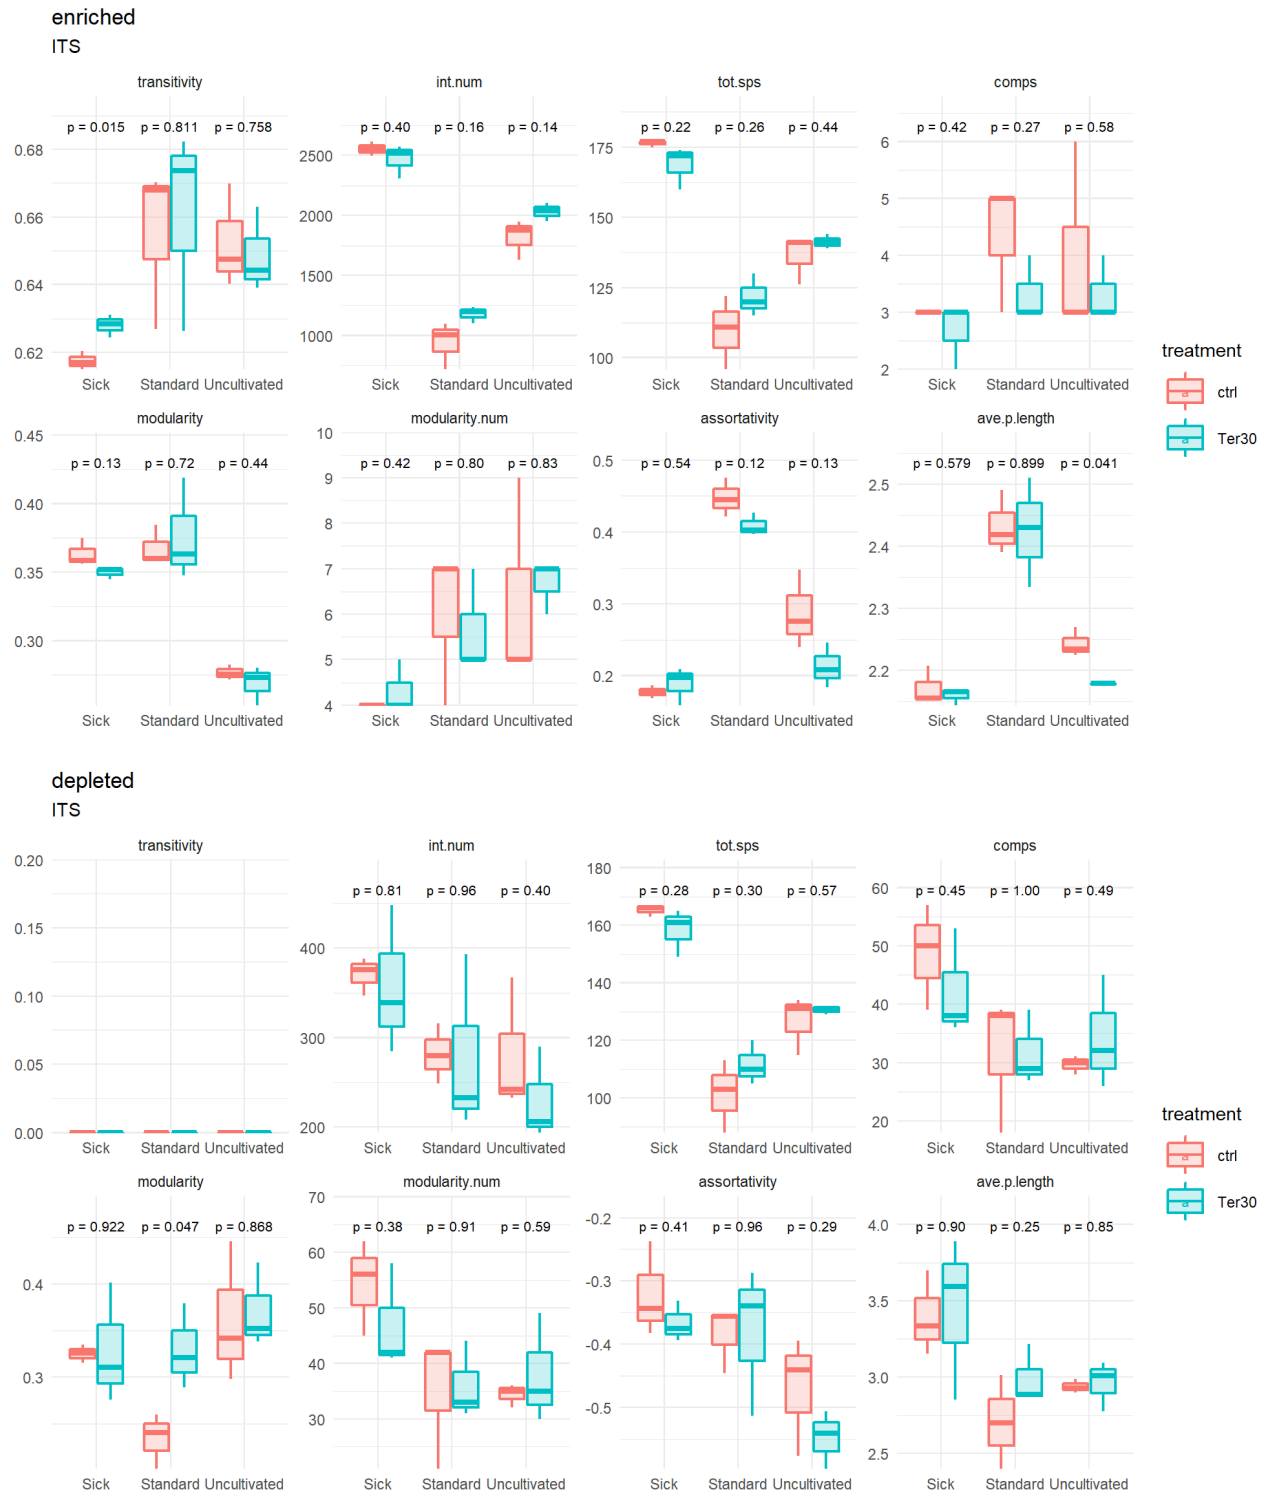

## A 16S - enriched

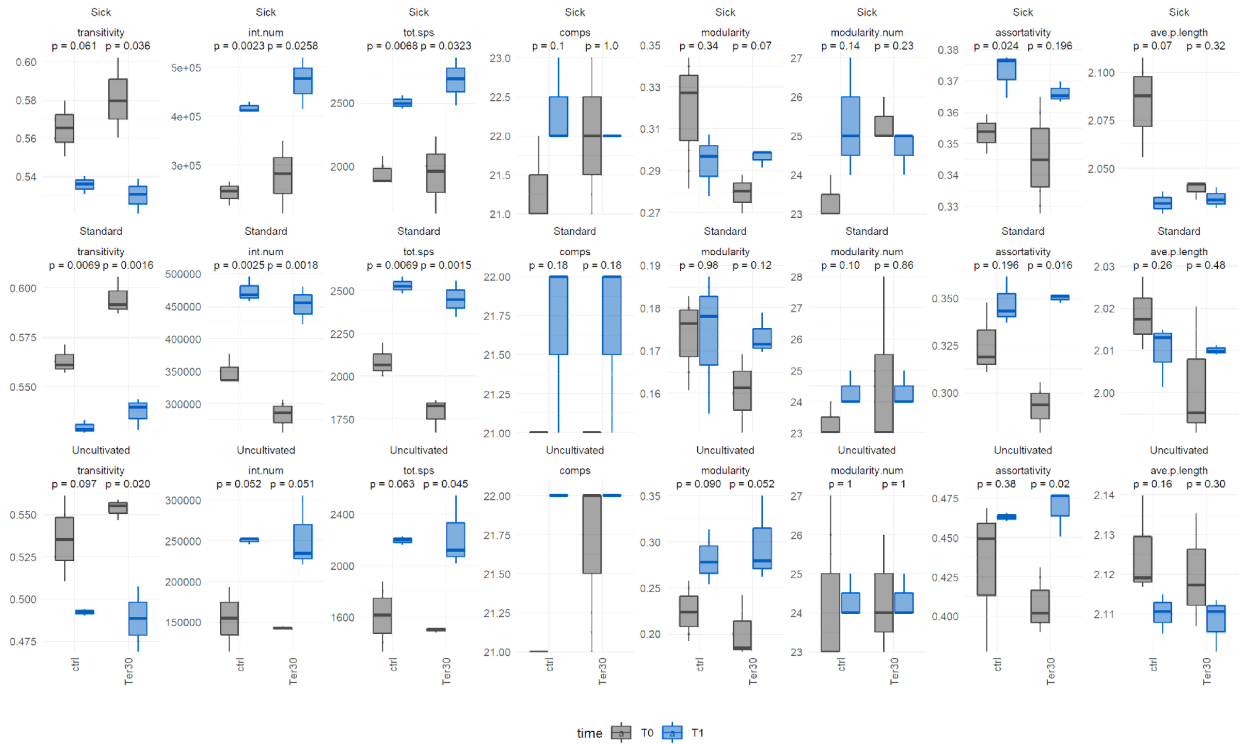

## B 16S - depleted

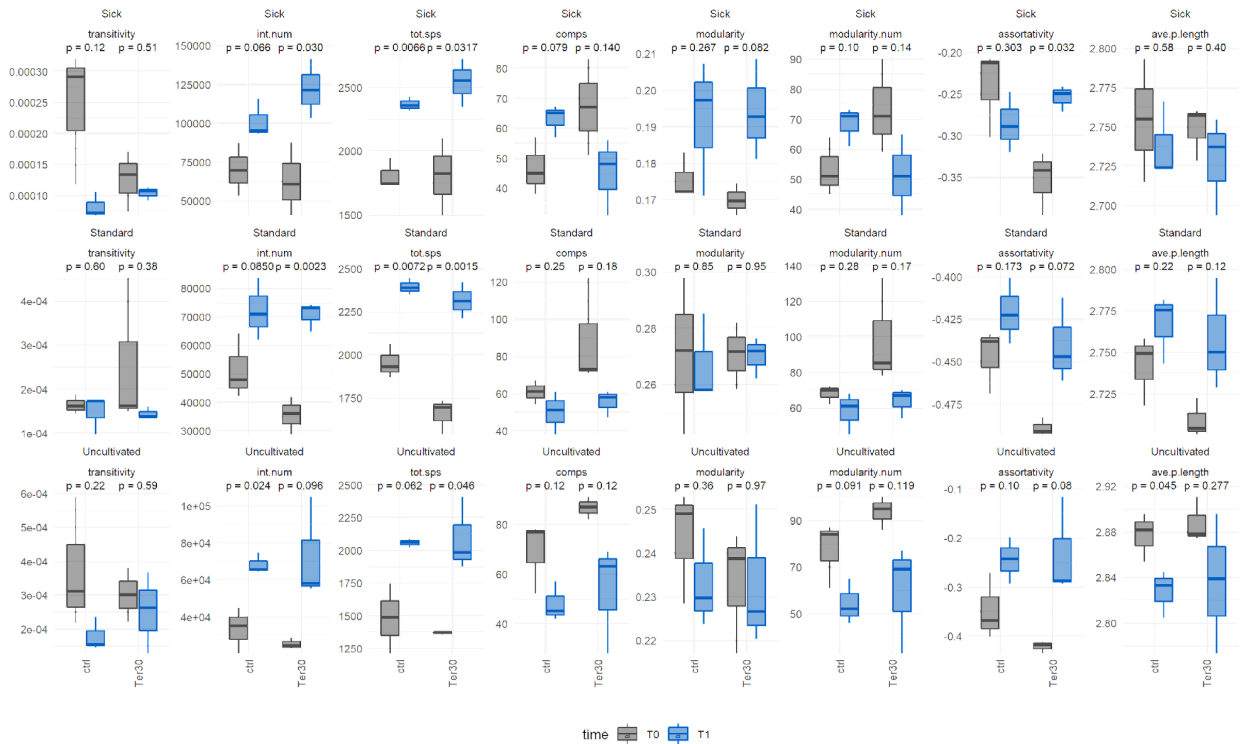

**Figure S5** Network properties comparison before and after treatment for Terramin 30 and control conditions for 16S marker. P-values represent the resulting pairwise statistical significance level between conditions.

## A ITS - enriched

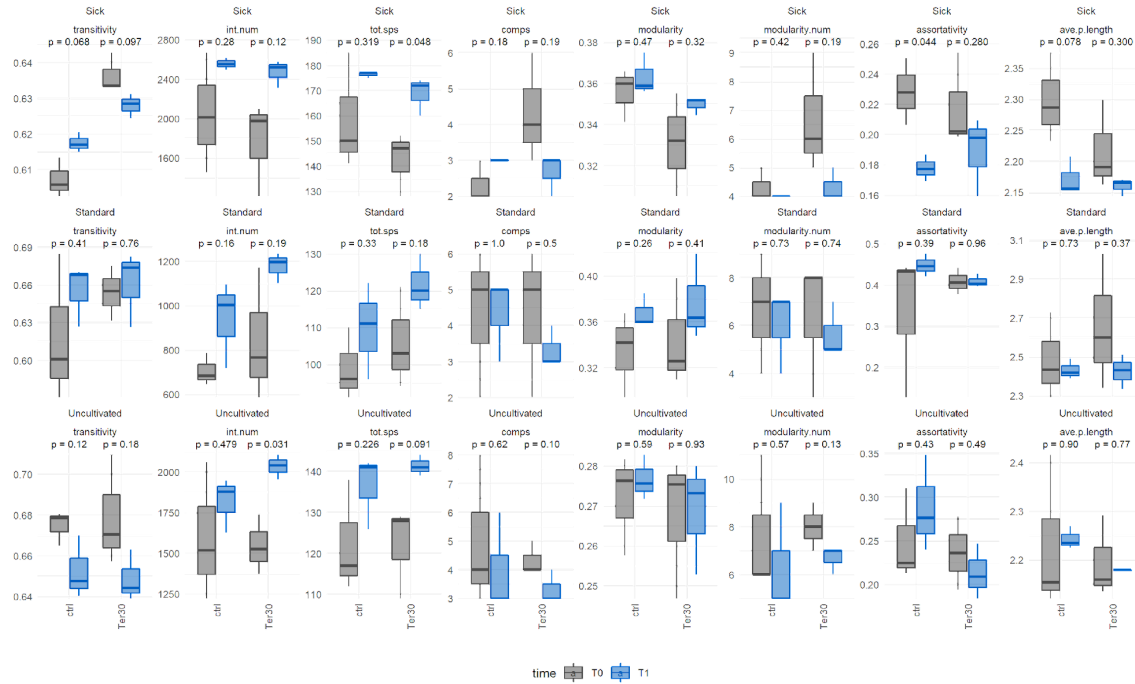

## B ITS - depleted

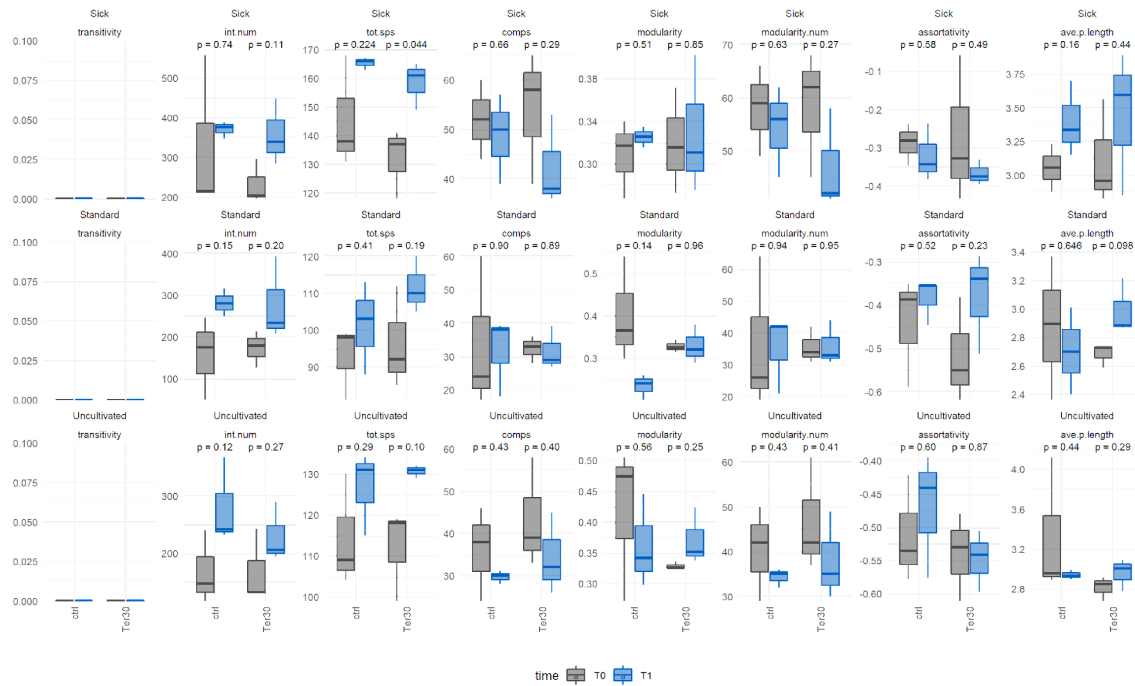

**Figure S6** Network properties comparison before and after treatment for Terramin 30 and control conditions for ITS marker. P-values represent the resulting pairwise statistical significance level between conditions.

**Table S1** Physicochemical characteristics of standard, sick and uncultured soils

| <b>Soil type</b>                     | <b>Standard</b> | <b>Sick</b>     | <b>Uncultured</b> |
|--------------------------------------|-----------------|-----------------|-------------------|
| % Sand                               | 55.06           | 53.42           | 47.42             |
| % Loam                               | 21.57           | 25.14           | 31.06             |
| % Clay                               | 23.37           | 21.44           | 21.51             |
| Texture                              | Sandy clay loam | Sandy clay loam | Loam              |
| pH (extract 1:2.5)                   | 8.62            | 9.09            | 9.12              |
| C.E. (dS/m) (extract 1:5)            | 0.31            | 0.23            | 0.19              |
| Na (meq/100 g)                       | 0.59            | 0.60            | 0.70              |
| K (meq/100 g)                        | 0.96            | 1.69            | 0.96              |
| Ca (meq/100 g)                       | 8.52            | 7.31            | 8.35              |
| Mg (meq/100 g)                       | 2.26            | 2.07            | 3.37              |
| %M.O. total                          | 1.19            | 1.22            | 0.78              |
| % M.O. Oxidable                      | 0.91            | 0.94            | 0.60              |
| %N.total                             | 0.09            | 0.08            | 0.05              |
| %C total                             | 0.69            | 0.71            | 0.45              |
| C/N                                  | 7.71            | 8.96            | 8.99              |
| P (mg/Kg)                            | 114.80          | 109.80          | 32.20             |
| % CaCO <sub>3</sub> Total            | 29.00           | 33.00           | 35.00             |
| % CaCO <sub>3</sub> active           | 10.84           | 11.82           | 13.30             |
| Cl <sup>-</sup> (meq/100 g)          | 0.40            | 0.20            | 0.09              |
| SO <sub>4</sub> -2 (meq/100g)        | 0.16            | 0.09            | 0.06              |
| Fe (mg/Kg)                           | 6.29            | 3.14            | 2.64              |
| Mn (mg/Kg)                           | 5.63            | 2.59            | 3.10              |
| Cu (mg/Kg)                           | 7.75            | 2.27            | 1.54              |
| Zn (mg/Kg)                           | 13.54           | 1.74            | 0.72              |
| B (mg/Kg)                            | 1.19            | 1.12            | 1.05              |
| NO <sub>3</sub> <sup>-</sup> (mg/kg) | < 10            | < 10            | < 10              |

**Table S2** Physicochemical composition of Terramin ® Pro biostimulant

|                          |             |
|--------------------------|-------------|
| pH                       | 7.2         |
| density (g/ml)           | 1.20 g/ml   |
| Total nitrogen           | 6.0% (w/w)  |
| Organic nitrogen         | 6.0% (w/w)  |
| L- $\alpha$ -amino acids | 18.0% (w/w) |
| Organic matter           | 40.0% (w/w) |
| <b>Aminogram (g/100)</b> |             |
| ASP                      | 8.75        |
| SER                      | 6.01        |
| GLU                      | 16.5        |
| GLY                      | 9.11        |
| HIS                      | 2.75        |
| ARG                      | 4.96        |
| THR                      | 8.08        |
| HYP                      | 0.45        |
| ALA                      | 8.56        |
| PRO                      | 5.69        |
| CIS                      | 0.88        |
| TYR                      | 1.45        |
| VAL                      | 6.53        |
| MET                      | 0.48        |
| LYS                      | 10.81       |
| ILE                      | 1.97        |
| LEU                      | 2.87        |
| PHE                      | 3.88        |
| TRP                      | 0.22        |



**Table S3** Permanova test comparing the variance at the beginning and at the end of the experiment (time) in all (general) and in each soil type.

|     | Soil type    | factor    | Df | SumsOfSqs | MeanSqs | F.Model | R2   | Pr(>F) | % Variance explained |
|-----|--------------|-----------|----|-----------|---------|---------|------|--------|----------------------|
| 16S | general      | time      | 1  | 0.72      | 0.72    | 16.27   | 0.17 | 0.001  | 17%                  |
|     |              | soiltype  | 2  | 2.11      | 1.06    | 23.77   | 0.50 | 0.001  | 50%                  |
|     |              | Residuals | 32 | 1.42      | 0.04    | -       | 0.33 | -      | -                    |
|     |              | Total     | 35 | 4.26      | -       | -       | 1.00 | -      | -                    |
|     | Standard     | time      | 1  | 0.29      | 0.29    | 6.70    | 0.40 | 0.005  | 40%                  |
|     |              | Residuals | 10 | 0.44      | 0.04    | -       | 0.60 | -      | -                    |
|     |              | Total     | 11 | 0.73      | -       | -       | 1.00 | -      | -                    |
|     | Sick         | time      | 1  | 0.27      | 0.27    | 7.16    | 0.42 | 0.002  | 42%                  |
|     |              | Residuals | 10 | 0.38      | 0.04    | -       | 0.58 | -      | -                    |
|     |              | Total     | 11 | 0.65      | -       | -       | 1.00 | -      | -                    |
|     | Uncultivated | time      | 1  | 0.42      | 0.42    | 12.00   | 0.55 | 0.002  | 55%                  |
|     |              | Residuals | 10 | 0.35      | 0.03    | -       | 0.45 | -      | -                    |
|     |              | Total     | 11 | 0.76      | -       | -       | 1.00 | -      | -                    |
| ITS | general      | time      | 1  | 0.49      | 0.49    | 4.87    | 0.07 | 0.002  | 7%                   |
|     |              | soiltype  | 2  | 3.51      | 1.76    | 17.36   | 0.48 | 0.001  | 48%                  |
|     |              | Residuals | 32 | 3.24      | 0.10    | -       | 0.45 | -      | -                    |
|     |              | Total     | 35 | 7.24      | -       | -       | 1.00 | -      | -                    |
|     | Standard     | time      | 1  | 0.30      | 0.30    | 2.00    | 0.17 | 0.019  | 17%                  |
|     |              | Residuals | 10 | 1.50      | 0.15    | -       | 0.83 | -      | -                    |
|     |              | Total     | 11 | 1.80      | -       | -       | 1.00 | -      | -                    |
|     | Sick         | time      | 1  | 0.23      | 0.23    | 6.27    | 0.39 | 0.005  | 39%                  |
|     |              | Residuals | 10 | 0.36      | 0.04    | -       | 0.61 | -      | -                    |
|     |              | Total     | 11 | 0.59      | -       | -       | 1.00 | -      | -                    |
|     | Uncultivated | time      | 1  | 0.33      | 0.33    | 3.31    | 0.25 | 0.004  | 25%                  |
|     |              | Residuals | 10 | 1.01      | 0.10    | -       | 0.75 | -      | -                    |
|     |              | Total     | 11 | 1.35      | -       | -       | 1.00 | -      | -                    |

**Table S4** Permanova test comparing after treatment (T1) after Terramin 30 and control conditions (treatment) in all (general) and in each soil type.

|      | soil type    | factor    | Df | SumsOfSqs | MeanSqs | F.Model | R2   | Pr(>F) | % Variance explained |
|------|--------------|-----------|----|-----------|---------|---------|------|--------|----------------------|
| 16 S | general      | treatment | 1  | 0.04      | 0.04    | 1.00    | 0.02 | 0.34   | -                    |
|      |              | soiltype  | 2  | 1.19      | 0.59    | 13.89   | 0.65 | 0.001  | 65%                  |
|      |              | Residuals | 14 | 0.60      | 0.04    | -       | 0.33 | -      | -                    |
|      |              | Total     | 17 | 1.83      | -       | -       | 1.00 | -      | -                    |
|      | Standard     | treatment | 1  | 0.05      | 0.05    | 0.87    | 0.18 | 0.5    | -                    |
|      |              | Residuals | 4  | 0.25      | 0.06    | -       | 0.82 | -      | -                    |
|      |              | Total     | 5  | 0.31      | -       | -       | 1.00 | -      | -                    |
|      | Sick         | treatment | 1  | 0.05      | 0.05    | 1.82    | 0.31 | 0.2    | -                    |
|      |              | Residuals | 4  | 0.11      | 0.03    | -       | 0.69 | -      | -                    |
|      |              | Total     | 5  | 0.16      | -       | -       | 1.00 | -      | -                    |
|      | Uncultivated | treatment | 1  | 0.04      | 0.04    | 1.31    | 0.25 | 0.2    | -                    |
|      |              | Residuals | 4  | 0.13      | 0.03    | -       | 0.75 | -      | -                    |
|      |              | Total     | 5  | 0.17      | -       | -       | 1.00 | -      | -                    |
| IT S | general      | treatment | 1  | 0.06      | 0.06    | 0.72    | 0.02 | 0.579  | -                    |
|      |              | soiltype  | 2  | 2.04      | 1.02    | 13.39   | 0.65 | 0.001  | 65%                  |
|      |              | Residuals | 14 | 1.07      | 0.08    | -       | 0.34 | -      | -                    |
|      |              | Total     | 17 | 3.17      | -       | -       | 1.00 | -      | -                    |
|      | Standard     | treatment | 1  | 0.06      | 0.06    | 0.46    | 0.10 | 1      | -                    |
|      |              | Residuals | 4  | 0.48      | 0.12    | -       | 0.90 | -      | -                    |
|      |              | Total     | 5  | 0.54      | -       | -       | 1.00 | -      | -                    |
|      | Sick         | treatment | 1  | 0.02      | 0.02    | 0.94    | 0.19 | 0.5    | -                    |
|      |              | Residuals | 4  | 0.10      | 0.03    | -       | 0.81 | -      | -                    |
|      |              | Total     | 5  | 0.13      | -       | -       | 1.00 | -      | -                    |
|      | Uncultivated | treatment | 1  | 0.06      | 0.06    | 0.58    | 0.13 | 1      | -                    |
|      |              | Residuals | 4  | 0.40      | 0.10    | -       | 0.87 | -      | -                    |
|      |              | Total     | 5  | 0.46      | -       | -       | 1.00 | -      | -                    |
